# Supplementary figures and images for: Identification of a Munc13-sensitive step in chromaffin cell large dense-core vesicle exocytosis
Source: eLife journal article supplement (doi:10.7554/elife.10635), 2015-11-17

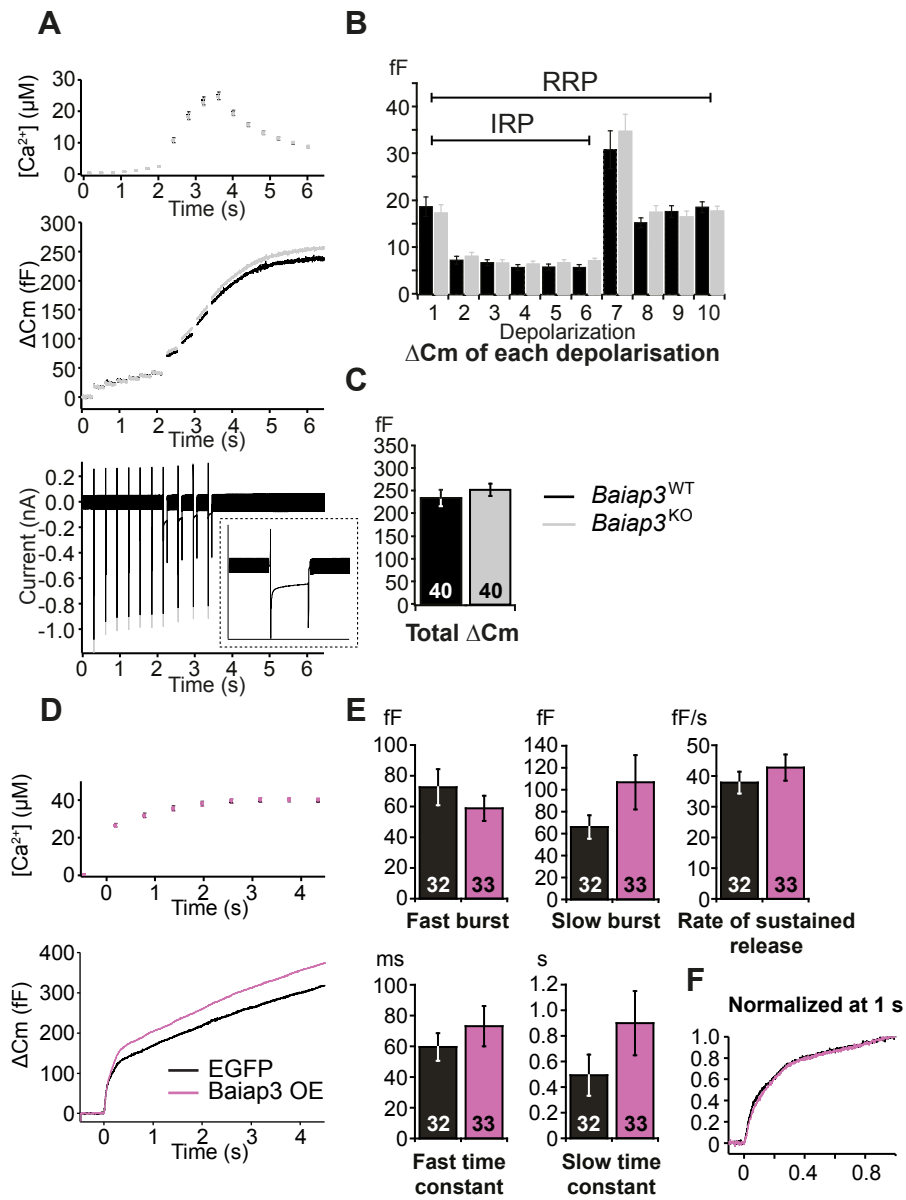

Supplement: supp [file elife-10635-supp-v1.zip]

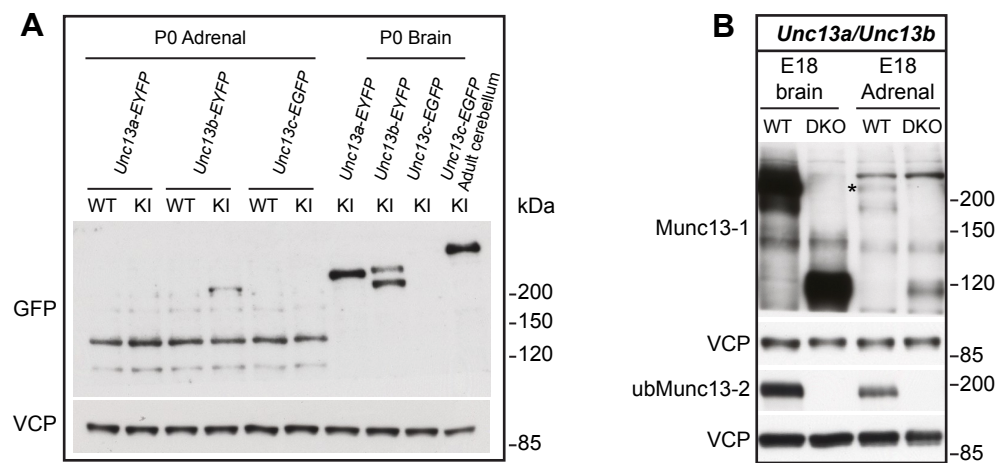

Supplement: supp [file elife-10635-supp-v1.zip]

Man et al. Figure 5-figure supplement 1

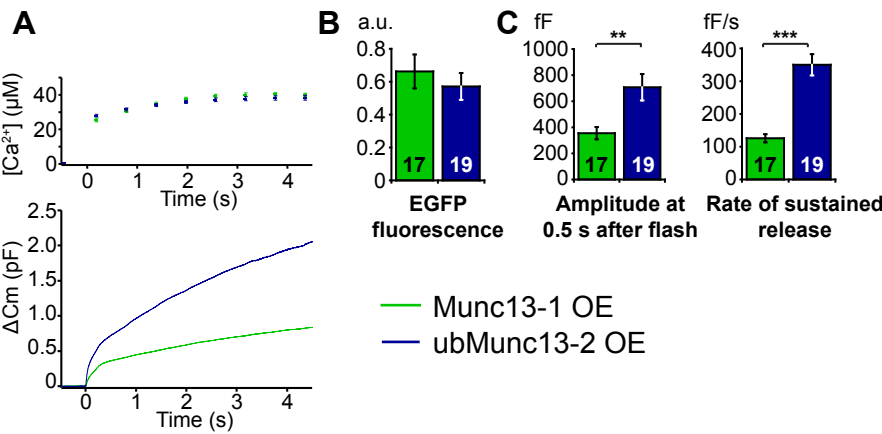

Supplement: supp [file elife-10635-supp-v1.zip]

Man et al. Figure 7-figure supplement 1

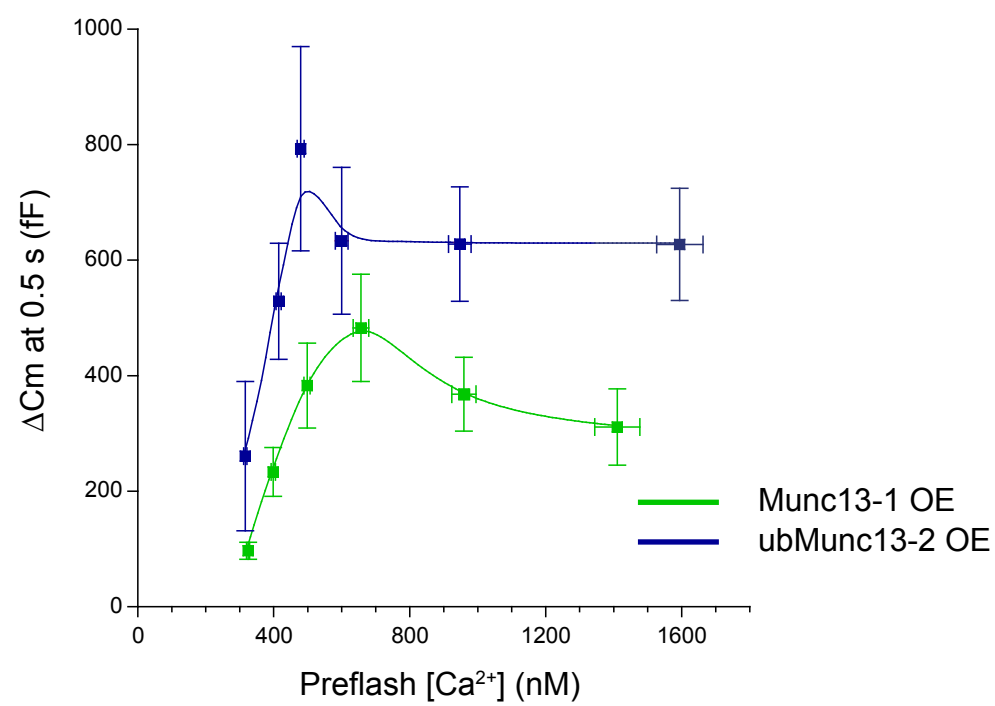

Supplement: supp [file elife-10635-supp-v1.zip]

Man et al. Figure 5-figure supplement 2

**A**

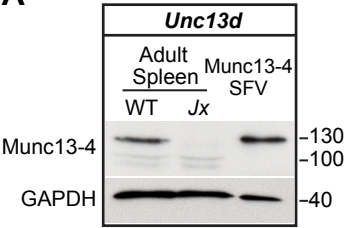

**B**

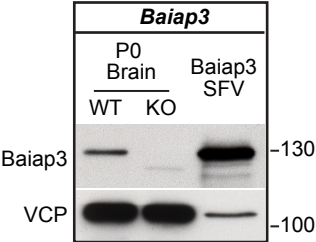

Supplement: supp [file elife-10635-supp-v1.zip]

Man et al. Figure 6-figure supplement 1

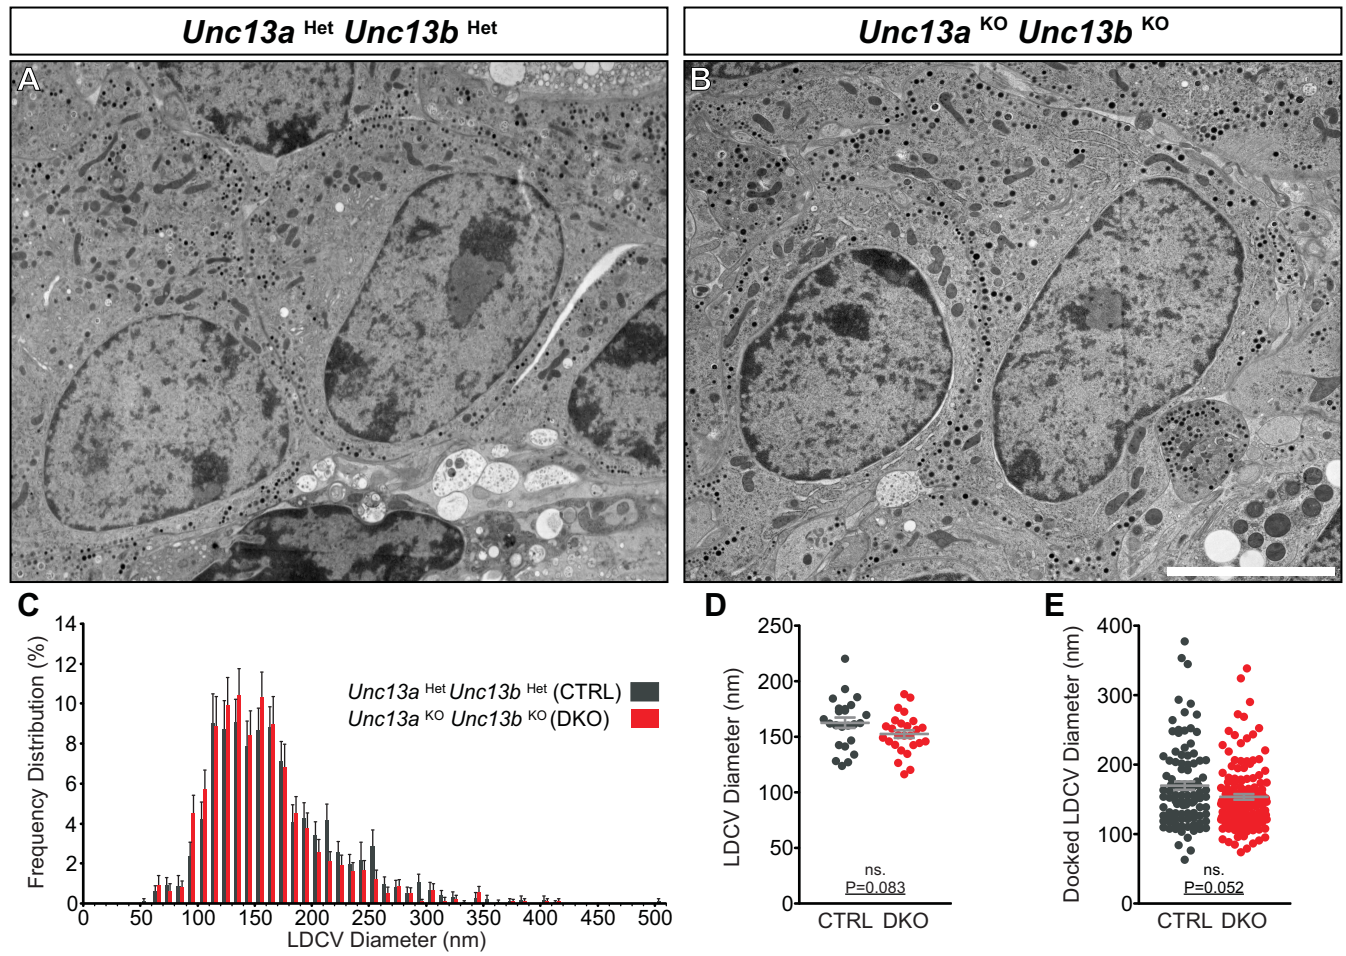

Supplement: supp [file elife-10635-supp-v1.zip]
